# Supplementary material for: “Emotional Proximity” and “Spatial Proximity”: Higher Relationship Quality and Nearer Distance Both Strengthen Scratch Contagion in Tibetan Macaques
Source: MDPI journal article supplement (doi:10.3390/ani12162151), 2022-08-22
Supplement: s1 [file s1]

| <b>ID</b>                                                               | <b>Age</b> | <b>Sex</b> | <b>Number of<br/>relatives</b> | <b>Social rank</b> |
|-------------------------------------------------------------------------|------------|------------|--------------------------------|--------------------|
| (adults and <u>sub adults</u> ,<br>a,b and c mean three<br>matrilineal) |            |            |                                |                    |
| YL                                                                      | 8          | Male       | 0                              | 1                  |
| YXK <sup>a</sup>                                                        | 9          | Male       | 6                              | 2                  |
| YXX <sup>a</sup>                                                        | 11         | Female     | 6                              | 3                  |
| YH <sup>a</sup>                                                         | 18         | Female     | 6                              | 4                  |
| DB                                                                      | 8          | Male       | 0                              | 5                  |
| NM                                                                      | 9          | Male       | 0                              | 6                  |
| TQ                                                                      | 11         | Male       | 0                              | 7                  |
| WM                                                                      | 15         | Male       | 0                              | 8                  |
| YCY <sup>a</sup>                                                        | 13         | Female     | 6                              | 9                  |
| YXY <sup>a</sup>                                                        | 6          | Female     | 6                              | 10                 |
| YCH                                                                     | 9          | Female     | 0                              | 11                 |
| TXH <sup>b</sup>                                                        | 12         | Female     | 6                              | 12                 |
| YCL <sup>a</sup>                                                        | 9          | Female     | 6                              | 13                 |
| DZ                                                                      | 7          | Male       | 0                              | 14                 |
| <u>TQS<sup>b</sup></u>                                                  | 6          | Male       | 6                              | 15                 |
| BHZ                                                                     | 12         | Male       | 0                              | 16                 |
| TH <sup>b</sup>                                                         | 18         | Female     | 6                              | 17                 |
| TXX <sup>b</sup>                                                        | 13         | Female     | 6                              | 18                 |
| TQL <sup>b</sup>                                                        | 8          | Female     | 6                              | 19                 |
| THY <sup>c</sup>                                                        | 12         | Female     | 2                              | 20                 |
| <u>TQY<sup>b</sup></u>                                                  | 5          | Female     | 6                              | 21                 |
| QT                                                                      | 7          | Male       | 0                              | 22                 |
| THX <sup>c</sup>                                                        | 9          | Female     | 2                              | 23                 |
| <u>YXM<sup>a</sup></u>                                                  | 5          | Male       | 6                              | 24                 |
| <u>TFH<sup>c</sup></u>                                                  | 5          | Female     | 2                              | 25                 |
| <u>TQG<sup>b</sup></u>                                                  | 4          | Female     | 6                              | 26                 |
